# Supplementary material
Source: Springer Nature journal article supplement (https://www.springermedizin.de/resource/supplementary/12970_2011_266_MOESM2_ESM.pdf/9594632)

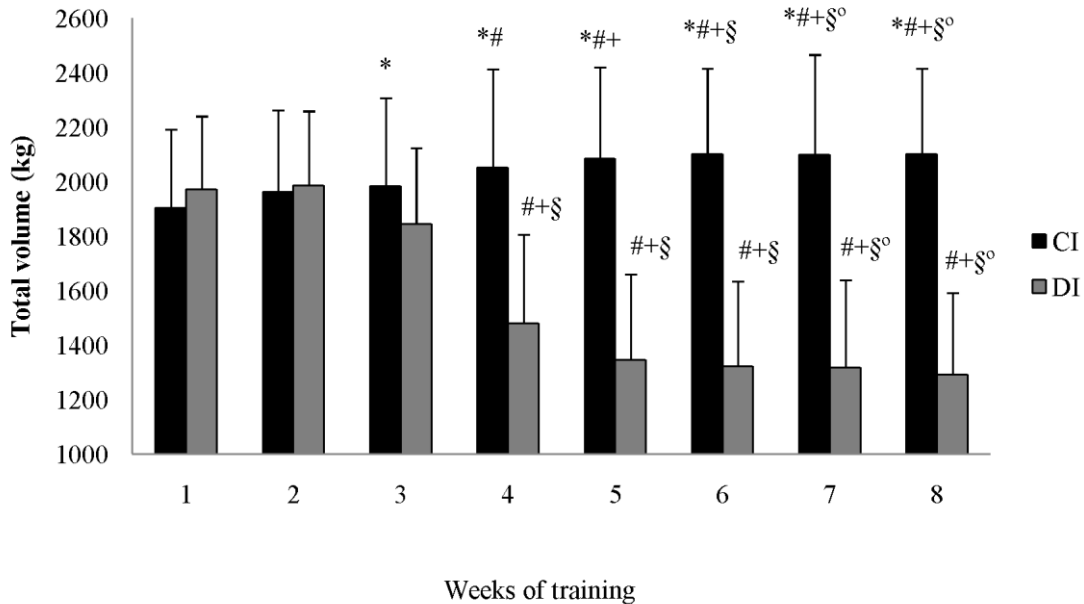

Supplement: MOESM2 [file 9594632]
